# Supplementary material for: Rph1 coordinates transcription of ribosomal protein genes and ribosomal RNAs to control cell growth under nutrient stress conditions
Source: PubMed Central journal article supplement — Nucleic Acids Res. 2020 Jul 3;48(15):8360–73. doi: 10.1093/nar/gkaa558 (PMC7470948; doi:10.1093/nar/gkaa558), 2020-07-03

**Rph1 coordinates transcription of ribosomal protein gene and ribosomal RNA to control cell growth under nutrient stress conditions**

Wen-Jie Shu<sup>1</sup>, Runfa Chen<sup>1</sup>, Zhao-Hong Yin<sup>1</sup>, Feng Li<sup>1</sup>, Heng Zhang<sup>2</sup>, and Hai-Ning Du<sup>1,\*</sup>

**Supplementary Table S1. Yeast strains**

| <b>Yeast strains</b>  | <b>Genotype</b>                                                 | <b>Source</b>   |
|-----------------------|-----------------------------------------------------------------|-----------------|
| BY4741                | MATa <i>his3Δ1 leu2Δ0 met15Δ0 ura3Δ0</i>                        | Open Biosystems |
| W303                  | MATa <i>leu2-3,112 trp1-1 can1-100 ura3-1 ade2-1 his3-11,15</i> | Open Biosystems |
| R1158                 | MATa <i>URA3::CMV-tTA his3-1 leu2-0 met15-0 ura3-1</i>          | GE Healthcare   |
| BY4741 <i>rph1Δ</i>   | <i>rph1Δ::KanMX</i>                                             | Open Biosystems |
| BY4741 <i>set2Δ</i>   | <i>set2Δ::KanMX</i>                                             | Open Biosystems |
| HNDY001               | <i>RPH1::RPH1-3xFlag-KanMX6</i>                                 | (1)             |
| HNDY044               | as BY4741 with pRS415 [empty vector]                            | (1)             |
| HNDY122               | BY4741 <i>rph1Δ::KanMX</i> , pRS415 [empty vector]              | This study      |
| HNDY123               | BY4741 <i>rph1Δ::KanMX</i> , pRS415 [endo-GFP-Rph1]             | This study      |
| HNDY124               | BY4741 <i>rph1Δ::KanMX</i> , pRS415 [endo-GFP-Rph1 H235A]       | This study      |
| HNDY125               | BY4741 <i>rph1Δ::KanMX</i> , pRS415 [endo-GFP-Rph1 JmjNΔ]       | This study      |
| HNDY126               | BY4741 <i>rph1Δ::KanMX</i> , pRS415 [endo-GFP-Rph1 ZFΔ]         | This study      |
| BY4741 <i>tor1Δ</i>   | <i>tor1Δ::KanMX</i>                                             | Open Biosystems |
| HNDY127               | BY4741 <i>tor1Δ::KanMX</i> , <i>rph1Δ::HygB</i>                 | This study      |
| HNDY128               | R1158 <i>rph1Δ::HygB</i>                                        | This study      |
| R1158 <i>Tet-tor2</i> | <i>pTOR2::kanR-tet07-TATA</i>                                   | GE Healthcare   |
| HNDY129               | R1158 <i>pTOR2::kanR-tet07-TATA</i> , <i>rph1Δ::HygB</i>        | This study      |
| BY4741 <i>rim15Δ</i>  | <i>rim15Δ::KanMX</i>                                            | Open Biosystems |
| HNDY130               | BY4741 <i>rph1Δ::KanMX</i> , <i>rim15Δ::HygB</i>                | This study      |
| HNDY131               | W303 <i>rph1Δ::KanMX</i>                                        | This study      |
| HNDY050               | BY4741 with pRS415 [ <i>pMET17-GFP-Rph1</i> ]                   | (1)             |
| HNDY051               | BY4741 with pRS415 [ <i>pMET17-GFP-Rph1 H235A</i> ]             | (1)             |
| HNDY052               | BY4741 with pRS415 [ <i>pMET17-GFP-Rph1 JmjNΔ</i> ]             | (1)             |
| HNDY053               | BY4741 with pRS415 [ <i>pMET17-GFP-Rph1 ZFΔ</i> ]               | (1)             |
| HNDY054               | BY4741 with pRS415 [ <i>pMET17-GFP-Gis1</i> ]                   | (1)             |
| HNDY132               | BY4741 with pRS415 [endo-GFP-Rph1]                              | This study      |
| HNDY133               | BY4741 pRS415 [endo-GFP-Rph1 S7A]                               | This study      |
| HNDY134               | BY4741 pRS415 [endo-GFP-Rph1 S7D]                               | This study      |
| HNDY135               | BY4741 <i>rph1Δ::KanMX</i> , pRS415 [endo-GFP-Rph1 S412A]       | This study      |
| HNDY136               | BY4741 <i>rph1Δ::KanMX</i> , pRS415 [endo-GFP-Rph1 S425/S426A]  | This study      |
| HNDY137               | BY4741 <i>rph1Δ::KanMX</i> , pRS415 [endo-GFP-Rph1 S429/430A]   | This study      |
| HNDY138               | BY4741 <i>rph1Δ::KanMX</i> , pRS415 [endo-GFP-Rph1 S434A]       | This study      |

|         |                                                                         |            |
|---------|-------------------------------------------------------------------------|------------|
| HNDY139 | BY4741 <i>rph1Δ::KanMX</i> , pRS415 [ <i>endo</i> -GFP-Rph1 S557A]      | This study |
| HNDY140 | BY4741 <i>rph1Δ::KanMX</i> , pRS415 [ <i>endo</i> -GFP-Rph1 S561A]      | This study |
| HNDY141 | BY4741 <i>rph1Δ::KanMX</i> , pRS415 [ <i>endo</i> -GFP-Rph1 S575A]      | This study |
| HNDY142 | BY4741 <i>rph1Δ::KanMX</i> , pRS415 [ <i>endo</i> -GFP-Rph1 S412D]      | This study |
| HNDY143 | BY4741 <i>rph1Δ::KanMX</i> , pRS415 [ <i>endo</i> -GFP-Rph1 S425/S426D] | This study |
| HNDY144 | BY4741 <i>rph1Δ::KanMX</i> , pRS415 [ <i>endo</i> -GFP-Rph1 S429/430D]  | This study |
| HNDY145 | BY4741 <i>rph1Δ::KanMX</i> , pRS415 [ <i>endo</i> -GFP-Rph1 S434D]      | This study |
| HNDY146 | BY4741 <i>rph1Δ::KanMX</i> , pRS415 [ <i>endo</i> -GFP-Rph1 S557D]      | This study |
| HNDY147 | BY4741 <i>rph1Δ::KanMX</i> , pRS415 [ <i>endo</i> -GFP-Rph1 S561D]      | This study |
| HNDY148 | BY4741 <i>rph1Δ::KanMX</i> , pRS415 [ <i>endo</i> -GFP-Rph1 S575D]      | This study |
| HNDY149 | BY4741 <i>rph1Δ::KanMX</i> , pRS415 [ <i>endo</i> -GFP-Rph1 S7A]        | This study |
| HNDY150 | BY4741 <i>rph1Δ::KanMX</i> , pRS415 [ <i>endo</i> -GFP-Rph1 S7D]        | This study |
| HNDY151 | BY4741 <i>rph1Δ::KanMX</i> , pRS415 [ <i>endo</i> -Rph1-3xFLAG]         | This study |
| HNDY152 | BY4741 <i>rph1Δ::KanMX</i> , pRS415 [ <i>endo</i> -Rph1-3xFLAG S7A]     | This study |
| HNDY153 | BY4741 <i>rph1Δ::KanMX</i> , pRS415 [ <i>endo</i> -Rph1-3xFLAG S7D]     | This study |
| HNDY154 | BY4741 <i>RRN3::RRN3-3xFlag-HygB</i>                                    | This study |
| HNDY155 | BY4741 <i>rph1Δ::KanMX</i> , <i>RRN3-3xFlag-HygB</i>                    | This study |

**Supplementary Table S2.** Primer sequences

| Primer               | Sequence                     | Purpose   | Reference /Source |
|----------------------|------------------------------|-----------|-------------------|
| <i>ATG7-pro-5'</i>   | CGCAAGATTTTTAACTTCCGCT       | ChIP-qPCR | This study        |
| <i>ATG7-pro-3'</i>   | AGCATCGTAAAATAATGAGTTCCT     | ChIP-qPCR | This study        |
| <i>Chr V-5'</i>      | GGCTGTCCAGAAATATGGGGCCGTAGTA | ChIP-qPCR | (2)               |
| <i>Chr V-3'</i>      | CACCCCGAAGCTTTCACAATAC       | ChIP-qPCR | (2)               |
| <i>rDNA A-5'</i>     | CAACCGAAACCAAAACCAAC         | ChIP-qPCR | (3)               |
| <i>rDNA A-3'</i>     | TGGCATGGATTTCCCTTTAG         | ChIP-qPCR | (3)               |
| <i>rDNA B-5'</i>     | TTTCTCGTAAGGTGCCGAGT         | ChIP-qPCR | (3)               |
| <i>rDNA B-3'</i>     | GGGGATCGAAGATGATCAGA         | ChIP-qPCR | (3)               |
| <i>rDNA C-5'</i>     | TACGAGCCTCCACCAGAGTT         | ChIP-qPCR | (3)               |
| <i>rDNA C-3'</i>     | AATCGACCGATCCTGATGTC         | ChIP-qPCR | (3)               |
| <i>rDNA D-5'</i>     | CAATCCAACGCTTACCGAAT         | ChIP-qPCR | (3)               |
| <i>rDNA D-3'</i>     | CGATGTCCGGCTCTTCCTATC        | ChIP-qPCR | (3)               |
| <i>rDNA E-5'</i>     | TCCCTCCATTTCCCTCTCTT         | ChIP-qPCR | (3)               |
| <i>rDNA E-3'</i>     | GGAAAGCGGGAAGGAATAAG         | ChIP-qPCR | (3)               |
| <i>5S rDNA-5</i>     | GTTGCGGCCATATCTACCAG         | ChIP-qPCR | This study        |
| <i>5S rDNA-3</i>     | GATTGCAGCACCTGAGTTTC         | ChIP-qPCR | This study        |
| <i>NOP1-C ter-5'</i> | CTACTGTAGACGCGGAAACC         | ChIP-qPCR | This study        |
| <i>NOP1-C ter-3'</i> | CCGCTTCTCATGTATCTACC         | ChIP-qPCR | This study        |
| <i>NOP1-pro-5'</i>   | GTGTCCCTTAACCCTTTAGAGC       | ChIP-qPCR | This study        |

|                       |                        |           |            |
|-----------------------|------------------------|-----------|------------|
| <i>NOP1-pro-3'</i>    | CGTGAATTTTACAGAACGGAGG | ChIP-qPCR | This study |
| <i>NSR1-C ter-5'</i>  | AGACCATCTGGTTCTGGTGC   | ChIP-qPCR | This study |
| <i>NSR1-C ter-3'</i>  | AACCAGCGAAAGAAGCGGTA   | ChIP-qPCR | This study |
| <i>NSR1-pro-5'</i>    | AAATTTGCAAGGGCAGCTCA   | ChIP-qPCR | This study |
| <i>NSR1-pro-3'</i>    | TGCAGACAGCAACAGCTACA   | ChIP-qPCR | This study |
| <i>PHR1-pro-5'</i>    | TCACAGAACAGACAACCAGCA  | ChIP-qPCR | This study |
| <i>PHR1-pro-3'</i>    | TGATTTGCGCCTGTCCTAGT   | ChIP-qPCR | This study |
| <i>RPL10-C ter-5'</i> | AACCAAGGACAGCAACAAGGA  | ChIP-qPCR | This study |
| <i>RPL10-C ter-3'</i> | ACCGTCGTCCTTGACTTCAC   | ChIP-qPCR | This study |
| <i>RPL10-pro-5'</i>   | CCCTCCGAAACTAGTTAGCACA | ChIP-qPCR | This study |
| <i>RPL10-pro-3'</i>   | AGCACTTGC GGAAAGGATGT  | ChIP-qPCR | This study |
| <i>RPL3-C ter-5'</i>  | TGGTTTCGTCCACTACGGTG   | ChIP-qPCR | This study |
| <i>RPL3-C ter-3'</i>  | TCAGCTGGGGTTTGAATCT    | ChIP-qPCR | This study |
| <i>RPL3-pro-5'</i>    | CGCACACTGGAATGAATGGC   | ChIP-qPCR | This study |
| <i>RPL3-pro-3'</i>    | AAACAGTTGTGCGTCGCTTC   | ChIP-qPCR | This study |
| <i>RPS12-C ter-5'</i> | AGGTGAATGGGCTGGTTTGG   | ChIP-qPCR | This study |
| <i>RPS12-C ter-3'</i> | TCAGTTTCAGCACCCCAGTT   | ChIP-qPCR | This study |
| <i>RPS12-pro-5'</i>   | ACCTTACCCGCAAGCAAACCT  | ChIP-qPCR | This study |
| <i>RPS12-pro-3'</i>   | ACTGCTCCGTGAAGAGTTTTGA | ChIP-qPCR | This study |
| <i>ACT1-5'</i>        | GAAATGCAAACCGCTGCTCA   | RT-qPCR   | This study |
| <i>ACT1-3'</i>        | TACCGGCAGATTCCAAACCC   | RT-qPCR   | This study |
| <i>ATG7-5'</i>        | ATGAGCATTGTCCAGCATGTAG | RT-qPCR   | This study |
| <i>ATG7-3'</i>        | GACCTCCTGCTTTATGACTGAC | RT-qPCR   | This study |
| <i>ETS1-5'</i>        | TGGGTTGATGCGTATTGAGA   | RT-qPCR   | (4)        |
| <i>ETS1-3'</i>        | TCGCTGATTTGAGAGGAGGT   | RT-qPCR   | (4)        |
| <i>ITS1-5'</i>        | TGTTTTGGCAAGAGCATGAG   | RT-qPCR   | (4)        |
| <i>ITS1-3'</i>        | TCGAATGCCCAAAGAAAAAG   | RT-qPCR   | (4)        |
| <i>NOP1-5'</i>        | GATCTAAGTTGGCTGCCGGT   | RT-qPCR   | This study |
| <i>NOP1-3'</i>        | CGGCGTAGACAACACCTTCT   | RT-qPCR   | This study |
| <i>NSR1-5'</i>        | TTCCGTCCGTATCCCAACAC   | RT-qPCR   | This study |
| <i>NSR1-3'</i>        | CTTCTTGGCGTCCTCCATGT   | RT-qPCR   | This study |
| <i>RPS31-5'</i>       | ACAAGGTGCTGCTGAAGGT    | RT-qPCR   | This study |
| <i>RPS31-3'</i>       | AGCCAAGAAAACACCAGCAC   | RT-qPCR   | This study |
| <i>RPL5-5'</i>        | CTTAGCTGCTGCCTACTCCC   | RT-qPCR   | This study |
| <i>RPL5-3'</i>        | TGCAAGGTTCTTCTGGCGAT   | RT-qPCR   | This study |
| <i>RPL30-5'</i>       | TTGCCGCTAACACTCCAGTT   | RT-qPCR   | This study |
| <i>RPL30-3'</i>       | CTTACCGACAGCAGTACCCA   | RT-qPCR   | This study |
| <i>RPL3-5'</i>        | TGGTTTCGTCCACTACGGTG   | RT-qPCR   | This study |
| <i>RPL3-3'</i>        | TCAGCTGGGGTTTGAATCT    | RT-qPCR   | This study |
| <i>RPS12-5'</i>       | AGGTGAATGGGCTGGTTTGG   | RT-qPCR   | This study |
| <i>RPS12-3'</i>       | TCAGTTTCAGCACCCCAGTT   | RT-qPCR   | This study |
| <i>RPH1-5</i>         | AACTCTAAGTTTGCGCCCGA   | RT-qPCR   | This study |
| <i>RPH1-3</i>         | TCTCACCAGAGTGGACGGAT   | RT-qPCR   | This study |

|                     |                       |         |     |
|---------------------|-----------------------|---------|-----|
| 18S <i>rDNA</i> -5' | GCTTGC GTTGATTACGTCCC | RT-qPCR | (4) |
| 18S <i>rDNA</i> -3' | CACTAAGCCATTCAATCGGT  | RT-qPCR | (4) |
| 25S <i>rDNA</i> -5  | CGTTCATAGCGACATTGCTT  | RT-qPCR | (4) |
| 25S <i>rDNA</i> -3  | GGGTGAACAATCCAACGCTT  | RT-qPCR | (4) |

### Supplementary Figure legends

**Figure S1. Protein levels of Rph1 is critical for controlling cell growth under nutrient stress conditions.** The indicated strains were spotted on YPD plates with or without rapamycin (A-C). **(A)** *RPH1*-deficient cells in W303 strain were resistant to different doses of rapamycin. **(B)** Cells lack of *RPH1* in BY4741 strain was also resistant to high concentration of rapamycin. **(C)** Cells with overexpression of the indicated GFP-Rph1 constructs lead to distinct response to rapamycin (left panel). The expression levels of the indicated cells were examined by immunoblotting with various antibodies (right panel).

**Figure S2. Transcriptional regulation by Rph1 under nutrient-rich medium.** **(A)** Volcano plots indicating the differentially expressed genes (DEGs) from overlapped two biological repeats in *rph1Δ* cells relative to WT. The vertical dashed gray lines in the plot represent log<sub>2</sub> normalized fold changes of ±0.5. The horizontal dashed gray line represents an adjusted *P* value of 0.05. ( $\log_2(\text{FC}) > 0.5, P < 0.05$ ). **(B)** GO analysis show the top 5 enriched upregulated gene clusters based on DEGs in A and C, respectively, by different pathways. BP: biological processes; CC: cellular components. **(C)** Boxplot showed genome-wide RPGs transcription in WT and *rph1Δ* cells. *P*-value denotes the result from two-tailed Student's *t*-test. **(D)** Expression of representative RPGs and Ribi genes was validated by RT-qPCR. Data are represented as mean ± SD from three biological replicates. *t*-test, \**P* < 0.05; \*\**P* < 0.01; \*\*\**P* < 0.001, n.s, "not significant".

**Figure S3. Overexpression of Rph1 decreased RP gene expression.** **(A)** Expression levels of Rph1 from cells expressing different *RPH1* constructs driven by the indicated promoters were examined by immunoblotting with an α-Rph1 antibody. **(B)** The indicated strains were spotted onto plates with or without rapamycin. **(C-D)** Comparison of expression levels of RP gene (C)

or rRNA (D) in different Rph1-overexpressing cells by RT-qPCR. Data are represented as mean  $\pm$  SD from three biological replicates. *t*-test, \*\**P* < 0.01; \*\*\**P* < 0.001.

**Figure S4. Genomic-wide enrichment of Rph1 in budding yeast.** (A) ChIP-seq profile of Rph1-Flag over chromosome V. (B) Genome browser view of Rph1 binding peaks on RPGs within the chromosome V of 30 kbp – 440 kbp. GSE121635 represents the ChIP-seq data obtained from NCBI. (C) Comparison of Rph1 ChIP-seq peaks between published dataset of GSE121635 and our dataset. (D) GO analysis from the published dataset of GSE121635 show the top 5 of Rph1-enriched peaks by different pathways. BP: biological processes; CC: cellular components.

**Figure S5. The enrichment of Rph1 in different genomic regions.** Enrichment of Rph1 ChIP-seq signals on RPGs (A), snoRNAs (B), rDNA loci (C), and Ribi genes (D) with or without rapamycin treatment. Data from two biological replicates. RPM: Read count Per Million mapped reads.

**Figure S6. Deletion of Rph1 did not affect Rrn3 association of 35S rDNA loci and processivity of RNAPII transcription under untreated or treated rapamycin conditions.** (A) ChIP-qPCR analysis were performed to examine RNAPII (Rpa190-Flag) enrichment over different rDNA loci in WT or *rph1* $\Delta$  cells without rapamycin treatment. IgG ChIP served as a negative control. (B) Western blot showed protein levels of the integrated 3xFlag tagged Rrn3 from each colony in either WT or *rph1* $\Delta$  cells using an anti-Flag antibody. (C-D) Relative enrichment of Rrn3 with the indicated rDNA loci in WT or *rph1* $\Delta$  cells was normalized to chromosome V locus by ChIP-qPCR analysis without (C) or with (D) rapamycin treatment. (E) Processivity assay of RNAPII transcription were performed in the *rph1* $\Delta$  cells relative to WT. The IP/input value for the 3' end (the D locus) was divided by the value for the 5' end (the B locus), and the ratio ("processivity") for *rph1* $\Delta$  was normalized to that for WT. Data are represented as mean  $\pm$  SD from three biological replicates. *t*-test, n.s, represents "not significant"

**Figure S7. Rim15-dependent Rph1 phosphorylation regulates cell growth under rapamycin stress conditions.** (A) The phosphorylation states of Rph1-Flag at different time points upon rapamycin stress were examined using a phos-tag gel. (B) Phosphorylation sites on Rph1 protein identified in previous studies as indicated in the Saccharomyces Genome Database (SGD) were marked in red. (C-D) Rapamycin sensitivity of various Rph1 mutants were monitored by a spot assay (top panel), and protein levels of various GFP-Rph1 mutants expressed in *rph1Δ* strain were examined by immunoblotting (bottom panel). G6PDH served as a loading control. (E) Cells with overexpression of WT, S7A or S7D Rph1 constructs were spotted on YPD plates with or without different doses of rapamycin.

### Reference:

1. Li, F., Zheng, L.D., Chen, X., Zhao, X., Briggs, S.D. and Du, H.N. (2017) Gcn5-mediated Rph1 acetylation regulates its autophagic degradation under DNA damage stress. *Nucleic Acids Res.*, **45**, 5183-5197.
2. Keogh, M.C. and Buratowski, S. (2004) Using chromatin immunoprecipitation to map cotranscriptional mRNA processing in *Saccharomyces cerevisiae*. *Methods Mol. Biol.*, **257**, 1-16.
3. Tessarz, P., Santos-Rosa, H., Robson, S.C., Sylvestersen, K.B., Nelson, C.J., Nielsen, M.L. and Kouzarides, T. (2014) Glutamine methylation in histone H2A is an RNA-polymerase-I-dedicated modification. *Nature*, **505**, 564-568.
4. Laribee, R.N., Hosni-Ahmed, A., Workman, J.J. and Chen, H. (2015) Ccr4-not regulates RNA polymerase I transcription and couples nutrient signaling to the control of ribosomal RNA biogenesis. *PLoS Genet.*, **11**, e1005113.

**Figure S1**

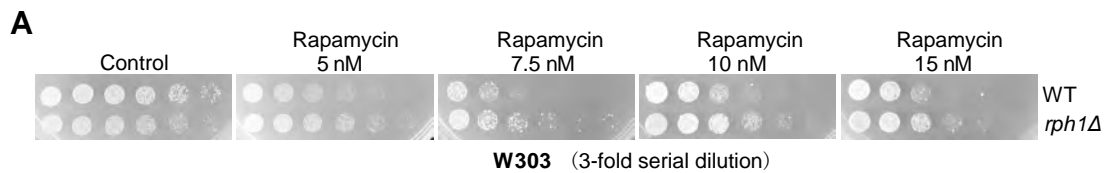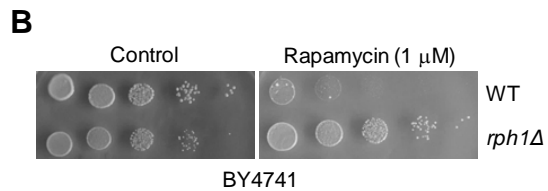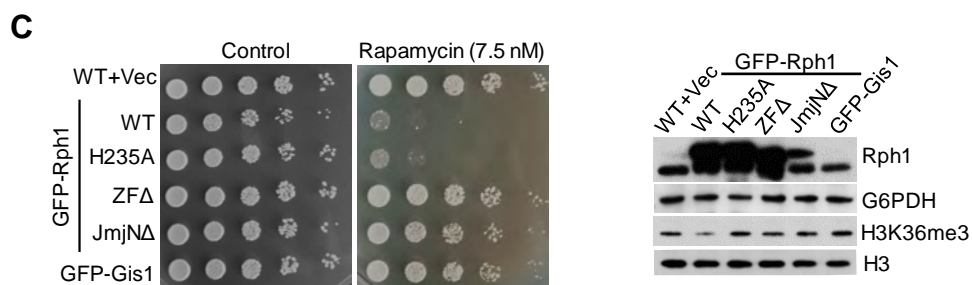

**Figure S2**

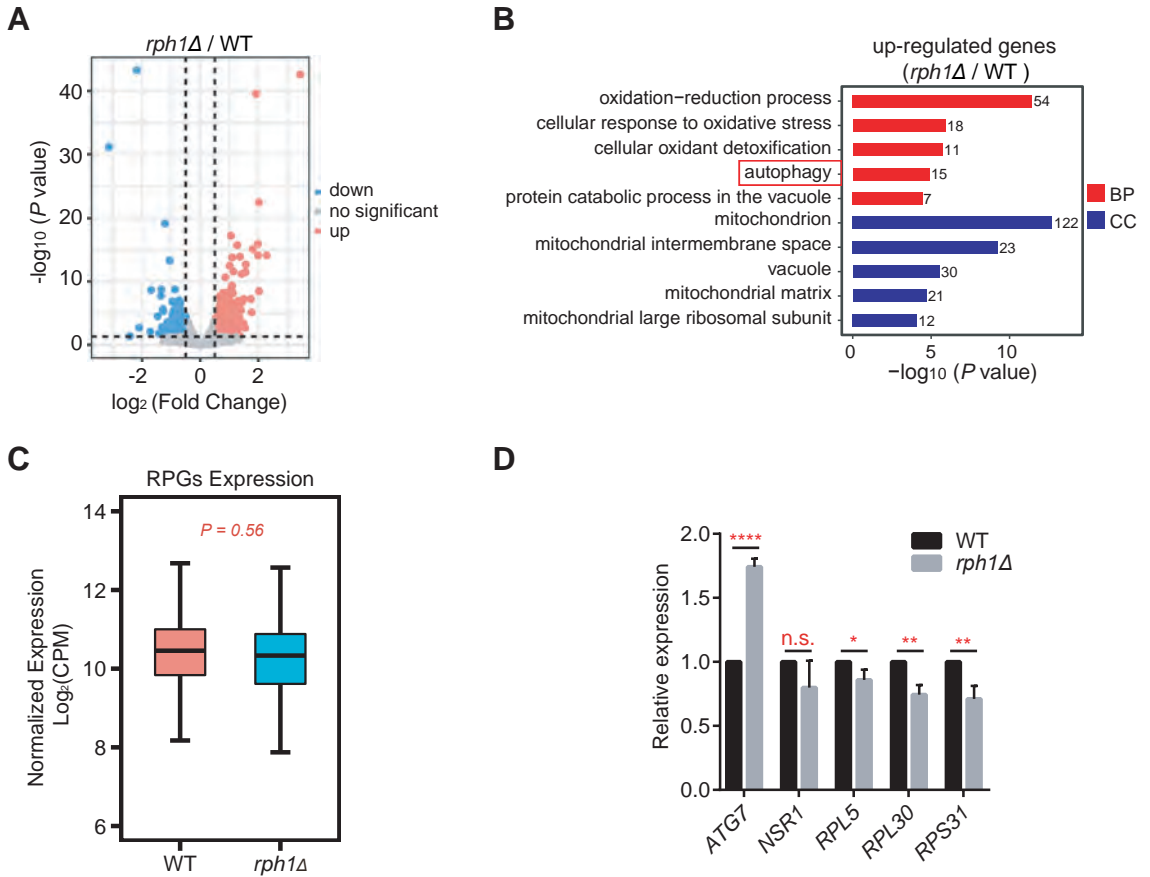



**Figure S3****A**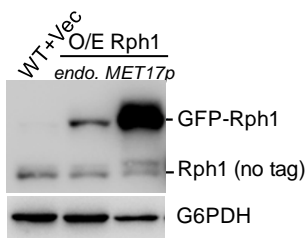**B**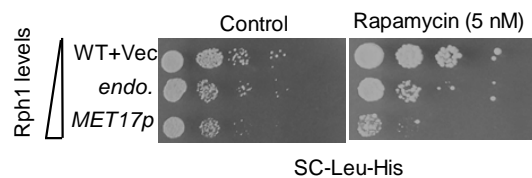**C**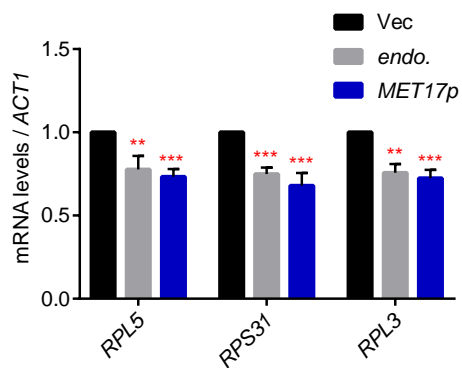**D**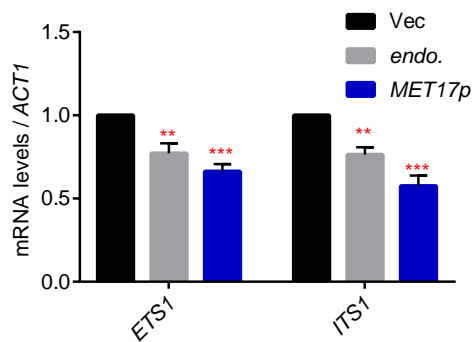

**Figure S4**

**A**

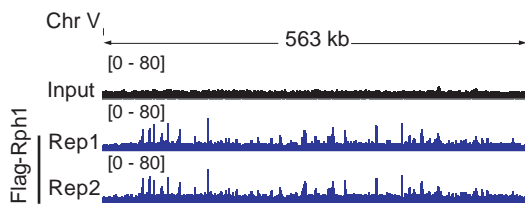

**B**

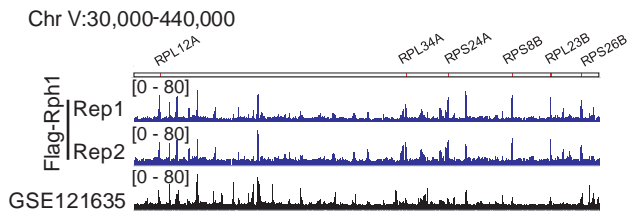

**C**

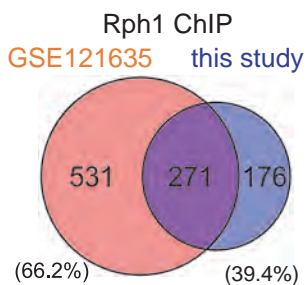

**D**

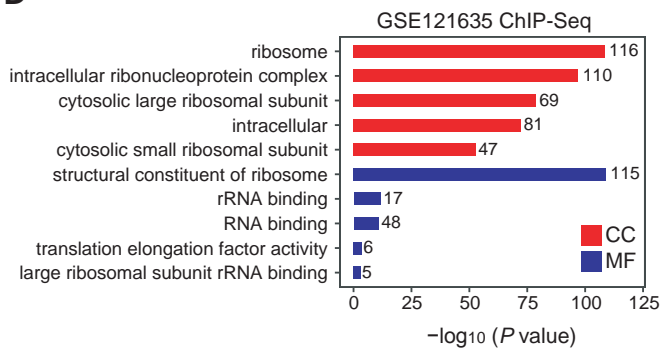

**Figure S5**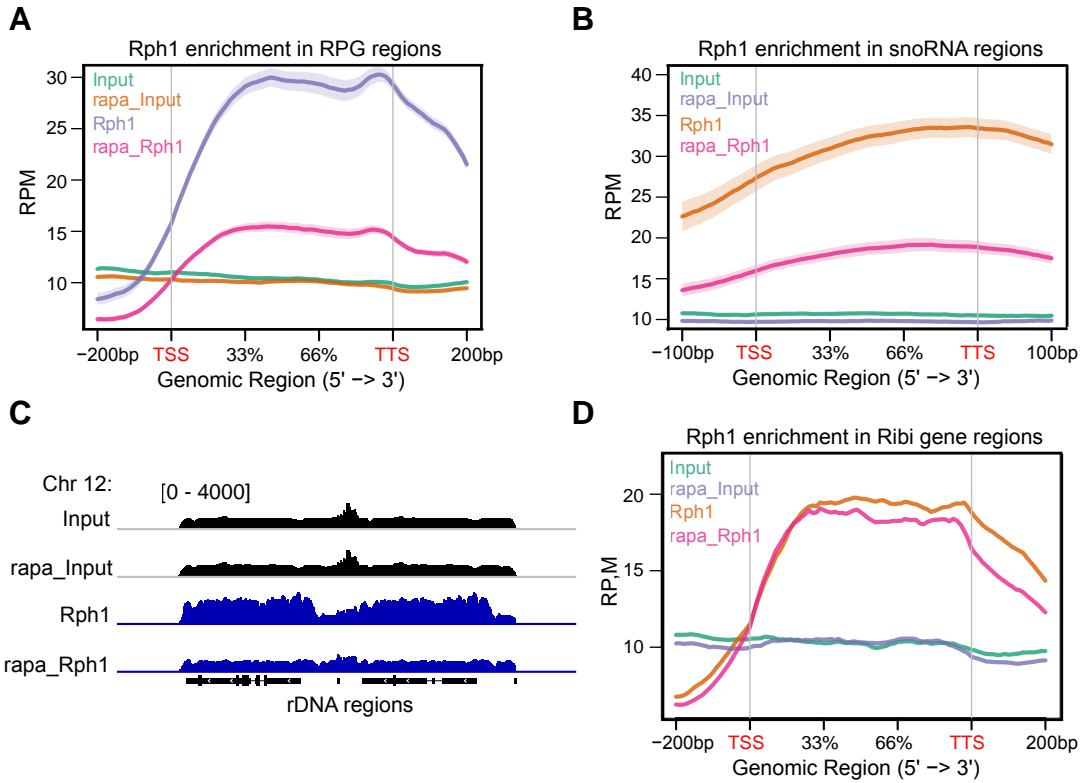

**Figure S6**

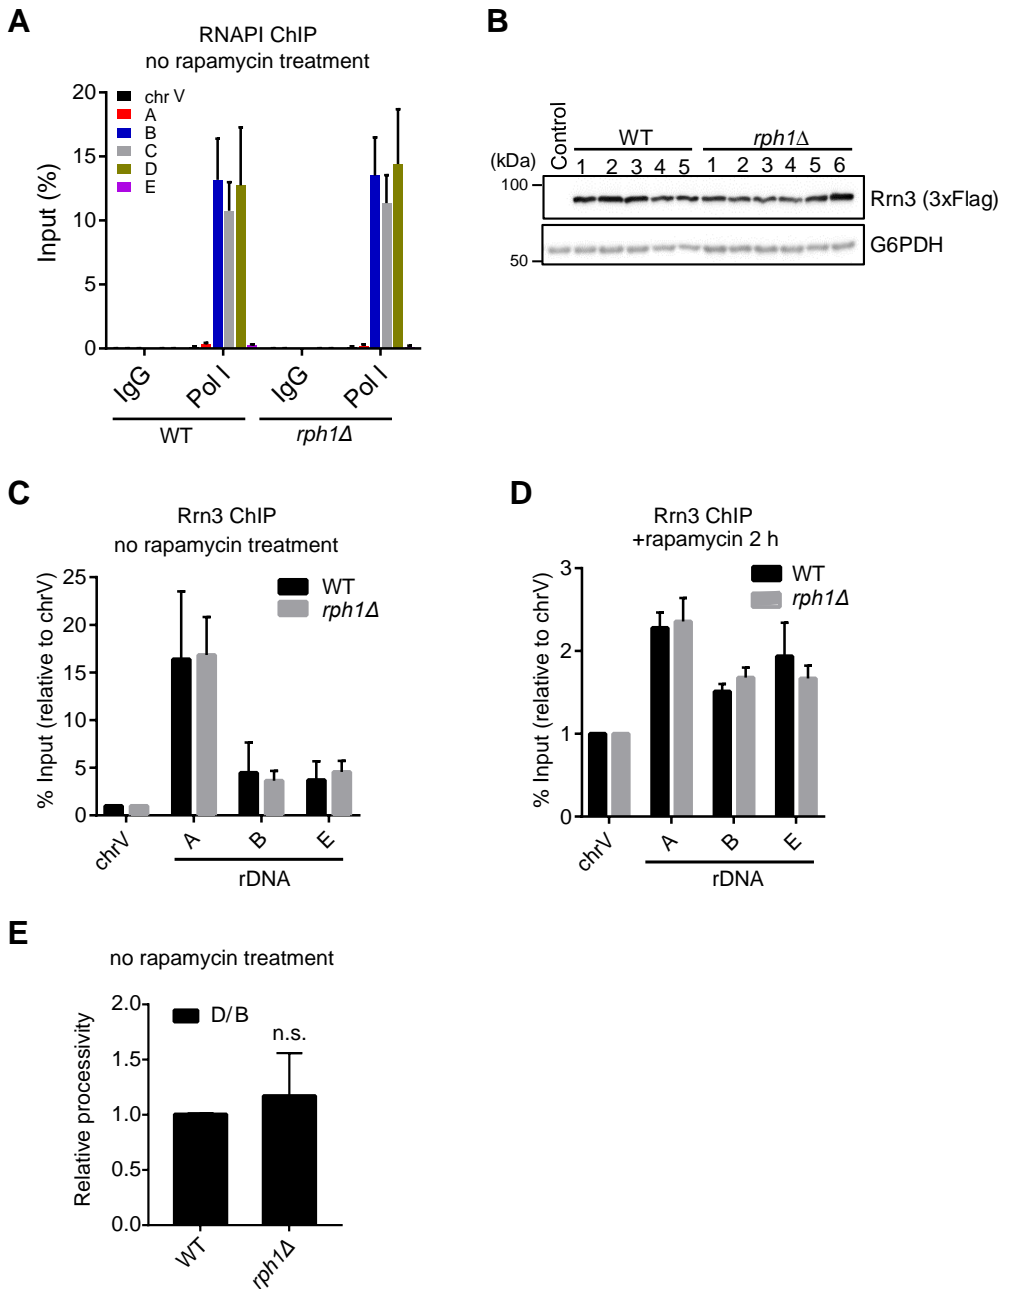

**Figure S7**

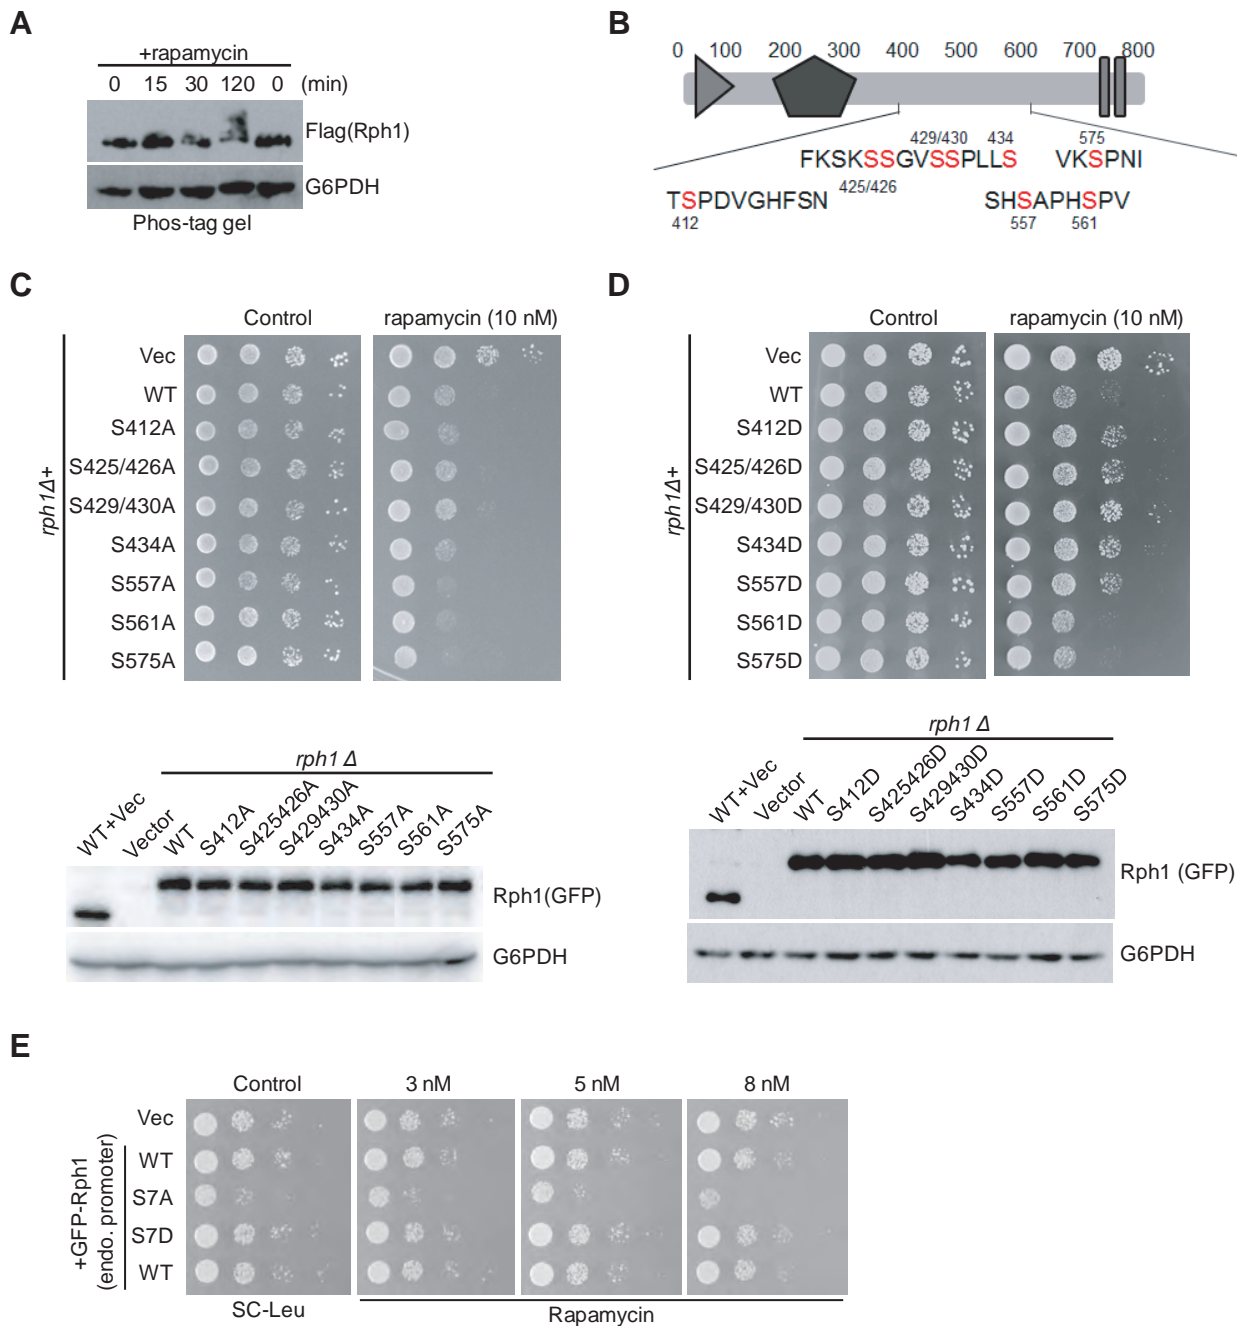

Supplement: gkaa558_supplemental_file.pdf [file gkaa558_supplemental_file.pdf]
